# Supplementary material
Source: MDPI journal article supplement (https://www.mdpi.com/2311-7524/9/6/692)
Supplement: s1 [file s1 › horticulturae-2428911-supplementary.pdf]

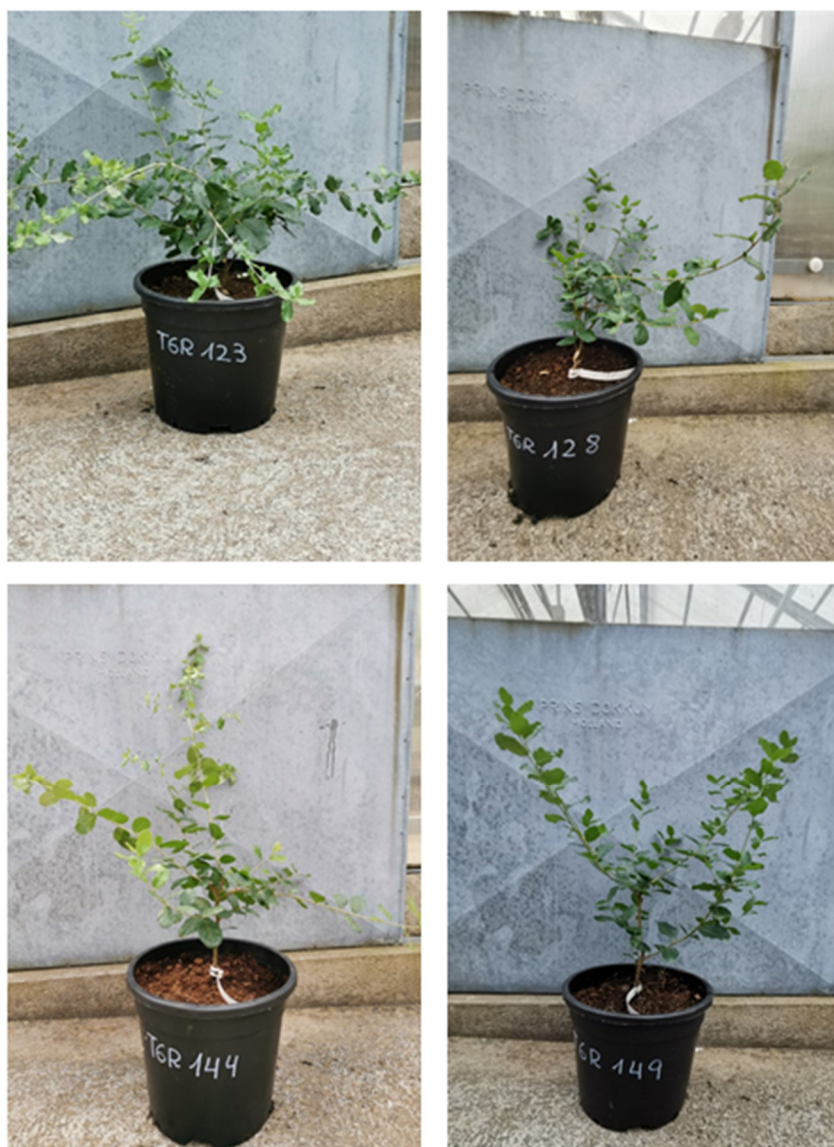

**Figure S1.** Aspect of cork oak tolerant plants resulted of Pc screening before the culture on climatic chamber.
